# Supplementary material for: Fast Imaging Technique for fMRI: Consecutive Multishot Echo Planar Imaging Accelerated with GRAPPA Technique
Source: Hindawi journal article supplement (doi:10.1155/2015/394213), 2015-01-01

Supplementary Figure. Effect of modified variable flip angle (mVFA) on temporal SNR. The temporal SNRs were substantially increased by mVFA with accelerated acquisitions relative to original VFA (oVFA). Note that all the data were normalized to  $R=1$ .

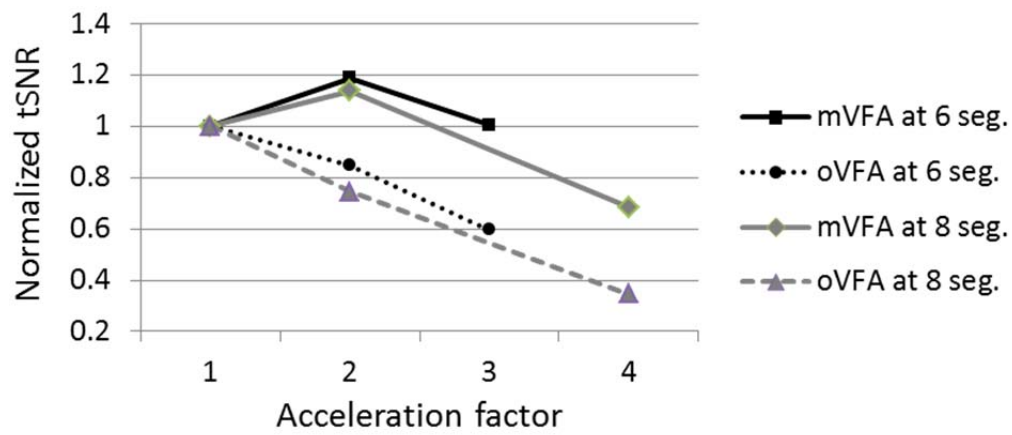

Supplement: f1 [file 394213.f1.pdf]
